# Supplementary material for: Modulation engineering of in situ cathodic activation of FePx based on W-incorporation for the hydrogen evolution reaction
Source: Royal Society of Chemistry journal article supplement (doi:10.1039/d0nr02661a), 2020-01-01
Supplement: d0nr02661a1.pdf [file d0nr02661a1.pdf]

## Supplementary Information

### Modulation engineering of in-situ cathodic activation of FeP<sub>x</sub> based on W-incorporation for hydrogen evolution

Min Yang <sup>a</sup>, Yu-Ran Zhu <sup>a</sup>, Zhong-Yuan Lin <sup>a</sup>, Xin-Tong Yan <sup>a</sup>, Bin Dong <sup>\*a</sup>, Ya-Nan Zhou <sup>a</sup>,

Qing-Zhong Li <sup>b</sup>, Yu-Lu Zhou <sup>a</sup>, Jun Nan <sup>a</sup>, Yong-Ming Chai <sup>\*a</sup>

*<sup>a</sup> State Key Laboratory of Heavy Oil Processing, College of Science, China University of*

*Petroleum (East China), Qingdao 266580, Shandong, China*

*<sup>b</sup> The Laboratory of Theoretical and Computational Chemistry, School of Chemistry and*

*Chemical Engineering, Yantai University, Yantai 264005, Shandong, China*

**\* Corresponding Authors.**

Email: dongbin@upc.edu.cn (B. Dong), ymchai@upc.edu.cn (Y.M. Chai)

## Experimental

### Materials

Iron foam (thickness: 1.5 mm, bulk density: 0.1 g cm<sup>-3</sup>) was purchased from Heze Tianyu Technology Development Co., Ltd. Iron sulphate heptahydrate (FeSO<sub>4</sub>·7H<sub>2</sub>O), sodium tungstate dehydrate (Na<sub>2</sub>WO<sub>4</sub>·2H<sub>2</sub>O), boric acid (H<sub>3</sub>BO<sub>3</sub>), sodium gluconate (C<sub>6</sub>H<sub>11</sub>NaO<sub>7</sub>), sodium chloride (NaCl), sodium hydroxide (NaOH), nitric acid (HNO<sub>3</sub>), hydrogen peroxide (H<sub>2</sub>O<sub>2</sub>, 30 wt. %), potassium hydroxide (KOH), and sodium hypophosphite (NaH<sub>2</sub>PO<sub>2</sub>·H<sub>2</sub>O) were purchased from Sinopharm Chemical Reagent Co., Ltd. All chemicals were used as received without further purification and all aqueous solutions were prepared with ultrapure water (>18.25 MΩ cm) obtained from Millipore system.

### Characterizations

Scanning electron microscopic (SEM) images and corresponding elemental distribution analyses were performed on JEOL JSM-7500F at an acceleration voltage of 5.0 kV equipped with an energy dispersive X-ray spectrometer. High-resolution transmission electron microscopic (HRTEM) images were taken on FEI Tecnai G20. X-ray diffraction patterns (XRD) were obtained from BRUKER D2 PHASER. ICP-AES was performed by inductively coupled plasma spectrometry (Agilent 720) and X-ray photoelectron spectroscopy (XPS) was conducted on Thermo Fisher Scientific Escalab 250Xi using Al K $\alpha$  radiation

### Electrochemical measurements

The electrochemical measurements were conducted with Gamry Reference 600

electrochemical workstation with a three-electrode system in 1.0 M KOH, using carbon rod, SCE as counter electrode and reference electrode, respectively. The working electrode included W-FeP<sub>x</sub>/IF, W-FeO<sub>x</sub>/IF, FeP<sub>x</sub>/IF, WO<sub>x</sub>/IF, and Blank IF. The potential conversion from SCE to RHE (reversible hydrogen electrode) was based on the following equation:  $E_{\text{RHE}} = E_{\text{SCE}} + 0.243 + 0.0591 \times \text{pH}$ . Linear sweep voltammetry (LSV) curves were performed at a scan rate of 5 mV s<sup>-1</sup>. Electrochemical impedance spectroscopy (EIS) measurements were conducted at -1.165 V (vs. SCE) with frequency from 10<sup>5</sup> Hz to 0.01 Hz at an AC voltage of 5 mV. CV tests were performed from -1.08 to -1.18 V (vs. SCE) at scan rates of 40, 60, 80, 100, and 120 mV s<sup>-1</sup>. Stability tests were measured by chronoamperometry of 100 h and CV of 10000 cycles.

The advantages of iron foam as substrate are described as follows: (i) Compared to other expensive metal substrates like Ni foam, NiFe alloy and Cu foil, iron foam with ultralow cost as the substrate shows great promise in large-scale commercial generation of hydrogen. (ii) Except Fe and W, there are no other kinds of metal compounds in the W-FeO<sub>x</sub> sample, which could also exert influence in catalytic performance.

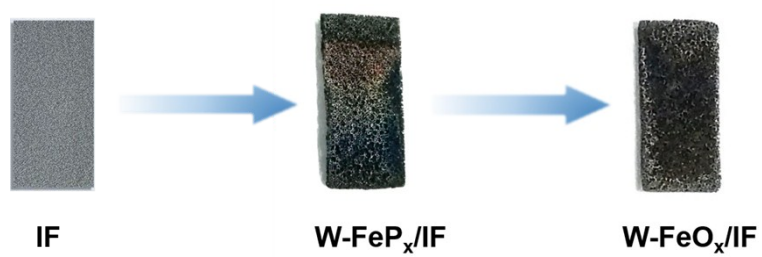

**Fig. S1** Photographs of prepared electrocatalysts.

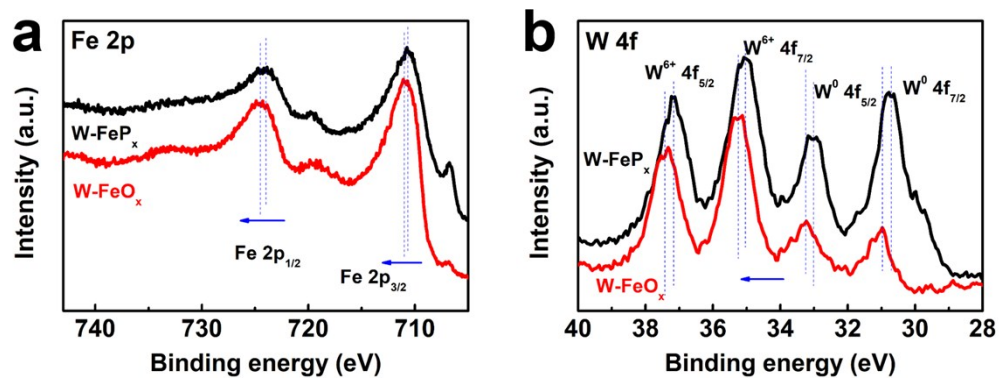

**Fig. S2** XPS peaks shift of (a) Fe 2p, (b) W 4f after in-situ cathodic activation.

**Table S1** The elemental content (mass ratio) of as-prepared W-FeO<sub>x</sub>/IF by ICP-AES.

| Sample                 | Fe     | W     | P     |
|------------------------|--------|-------|-------|
| W-FeO <sub>x</sub> /IF | 79.19% | 6.03% | 0.07% |

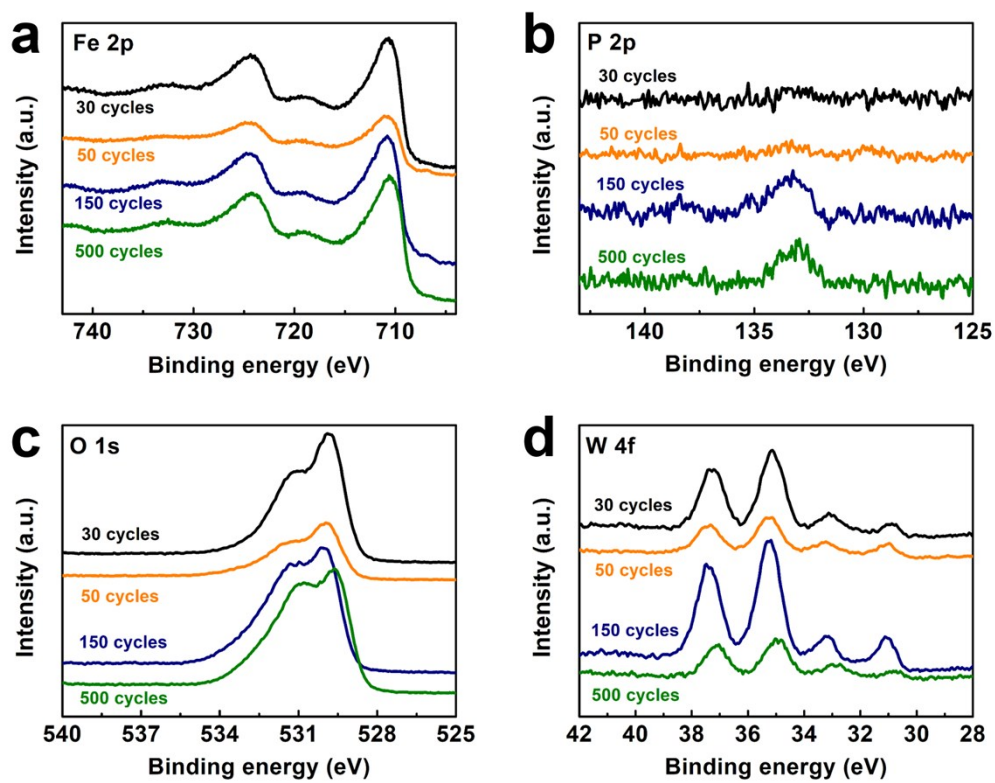

**Fig. S3** XPS spectra comparison of W-FeO<sub>x</sub>/IF obtained in different CV cycles. (a) Fe 2p, (b) P 2p, (c) O 1s, (d) W 4f.

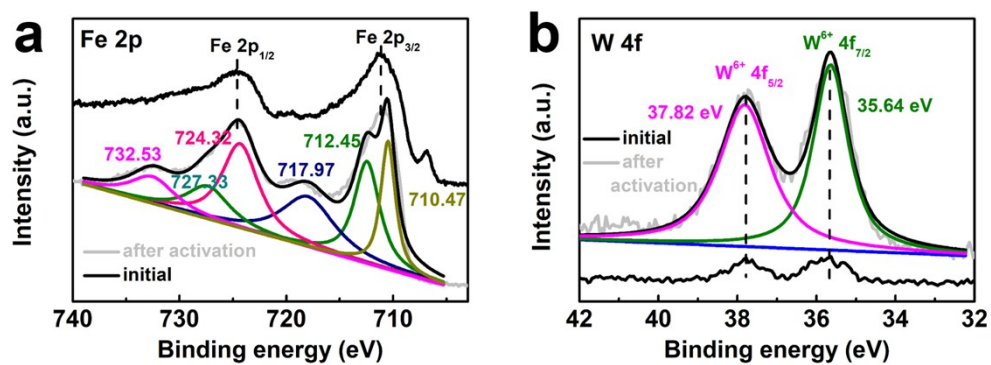

**Fig. S4** XPS spectra comparisons for monometallic materials before and after in-situ cathodic activation. (a) Fe 2p for FeO<sub>x</sub>/IF, (b) W 4f for WO<sub>x</sub>/IF.

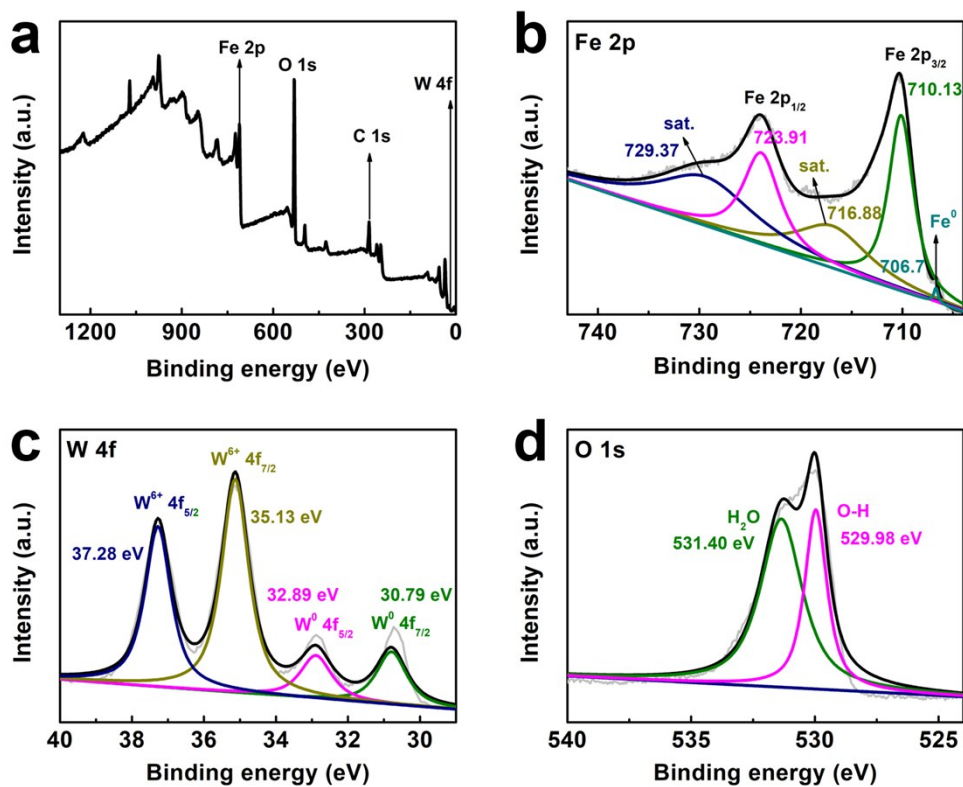

**Fig. S5** XPS spectra of FeW(OH)<sub>x</sub>/IF. (a) survey, (b) Fe 2p, (c) W 4f, (d) O 1s.

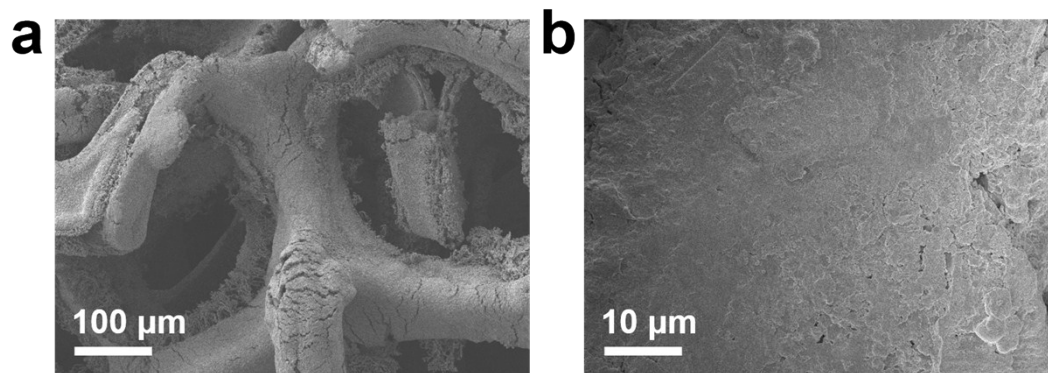

**Fig. S6** SEM images of (a,b) IF.

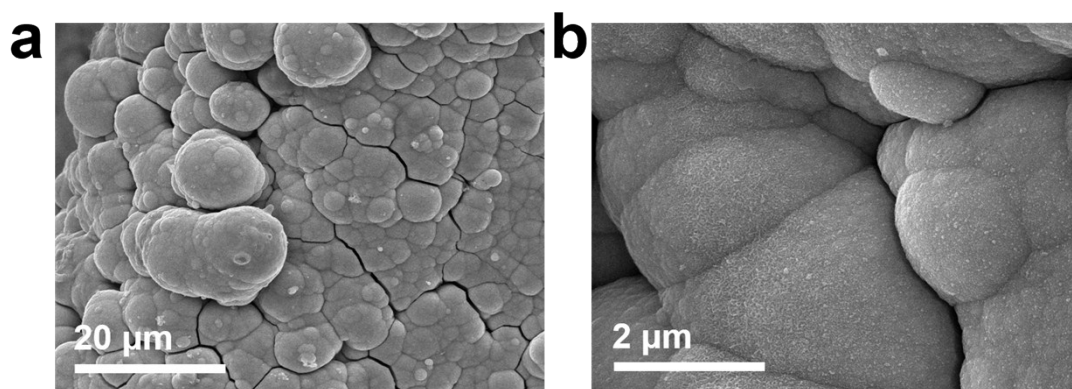

**Fig. S7** SEM images of (a,b) FeW(OH)<sub>x</sub>/IF.

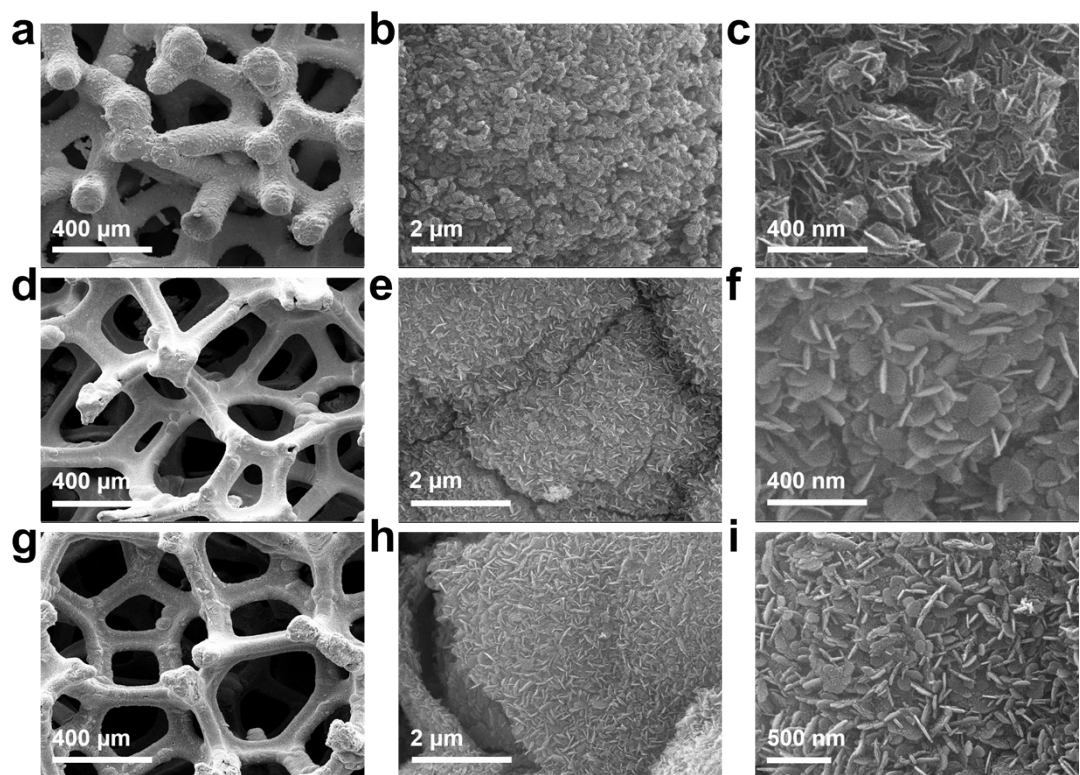

**Fig. S8** SEM images of W-FeO<sub>x</sub>/IF after (a-c) 30 cycles, (d-f) 150 cycles, and (g-i) 500 cycles of CV.

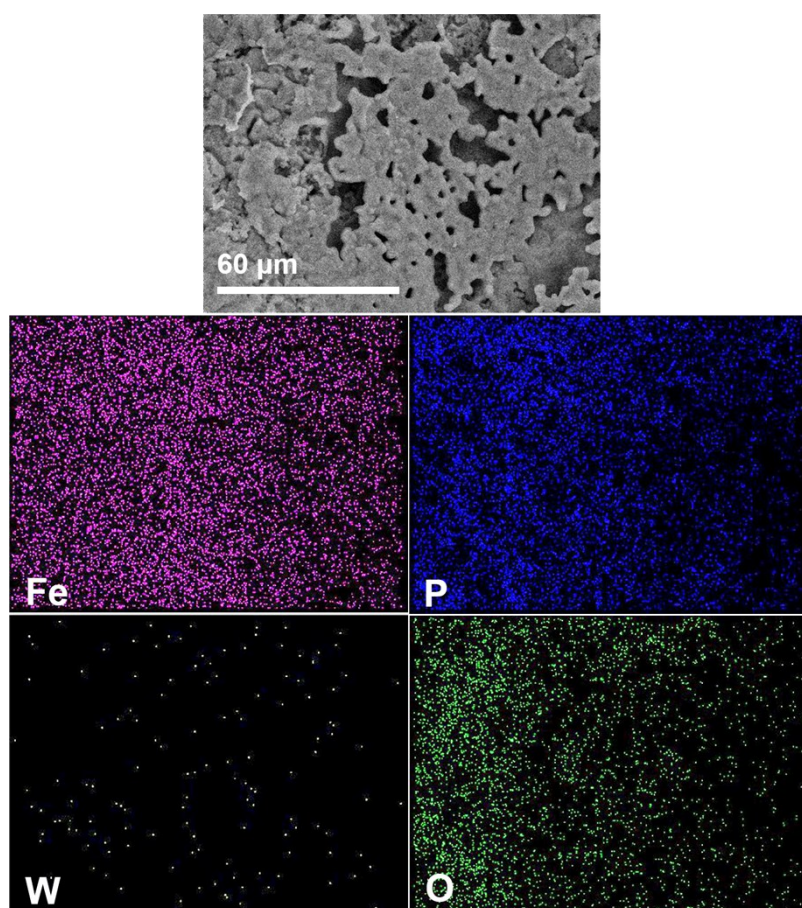

**Fig. S9** SEM image and corresponding elemental mapping of W-FeP<sub>x</sub>/IF.

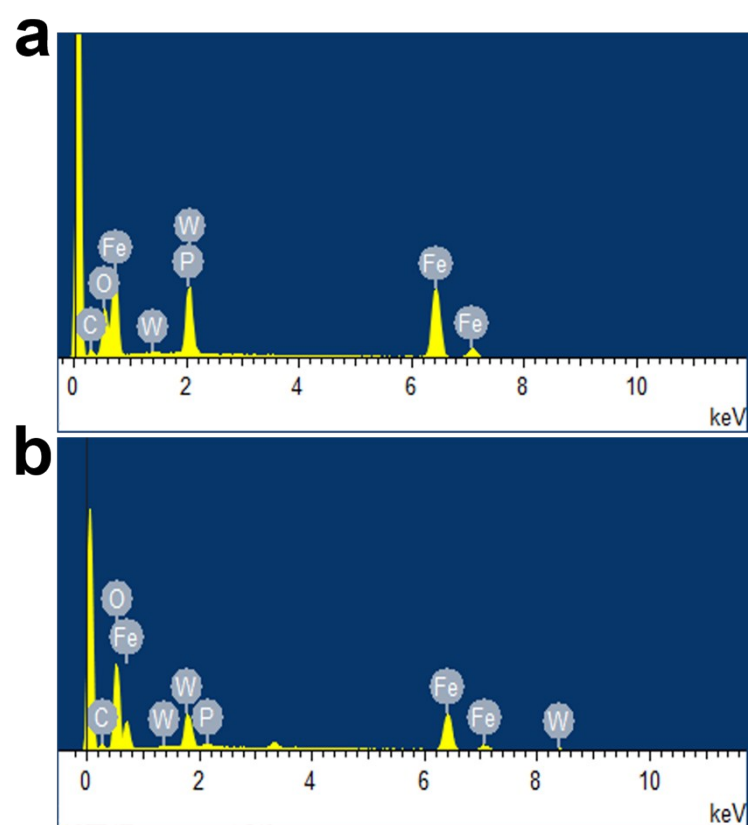

**Fig. S10** EDX spectra of (a) W-FeP<sub>x</sub>/IF and (b) W-FeO<sub>x</sub>/IF.

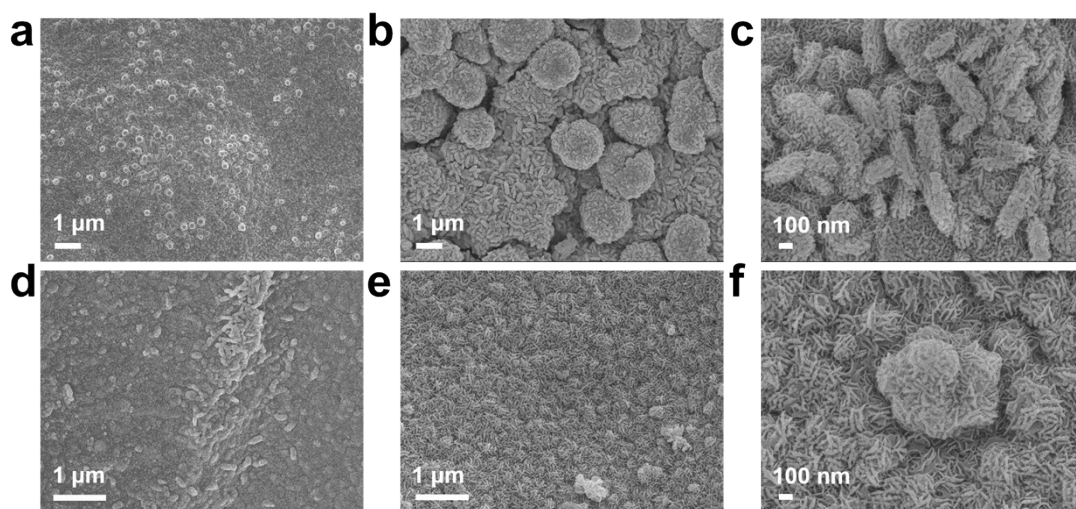

**Fig. S11** SEM images of FeO<sub>x</sub>/IF (a) before and (b, c) after 50 cycles of CV, and WO<sub>x</sub>/IF (d) before and (e, f) after 50 cycles of CV.

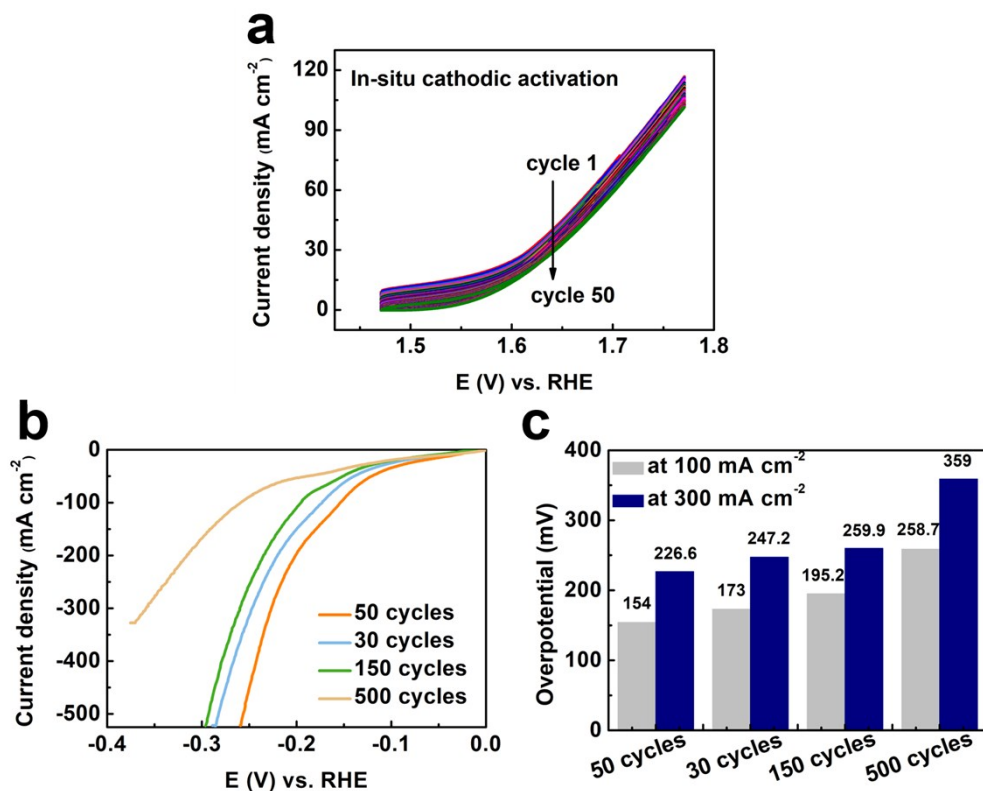

**Fig. S12** (a) In-situ cathodic activation applied by CV scanning at  $10 \text{ mV s}^{-1}$  for 50 cycles between 0.4-0.7 V (vs. SCE), (b) LSV polarization curves of W- $\text{FeO}_x/\text{IF}$  in different CV cycles, and (c) corresponding overpotentials comparison at the same current density.

**Table S2** The calculated ECSA values of as-prepared samples.

| Sample                 | $C_{dl}$ | $C_s$               | ECSA            |
|------------------------|----------|---------------------|-----------------|
|                        | mF       | mF cm <sup>-2</sup> | cm <sup>2</sup> |
| W-FeO <sub>x</sub> /IF | 24.86    | 0.04                | 621.5           |
| W-FeP <sub>x</sub> /IF | 24.63    | 0.04                | 615.75          |
| FeO <sub>x</sub> /IF   | 6.8      | 0.04                | 170.0           |
| WO <sub>x</sub> /IF    | 4.87     | 0.04                | 121.8           |
| Blank IF               | 2.3      | 0.04                | 57.5            |

### **The calculation of electrochemically active surface area (ECSA)**

The calculation of ECSA and roughness factor (RF) are based on the following equation:

$$\text{ECSA} = C_{\text{dl}} / C_s \quad (1)$$

In eq (1),  $C_{\text{dl}}$  is the measured double layer capacitance of samples in 1.0 M KOH (mF) and  $C_s$  is the specific capacitance of the catalyst ( $C_s = 0.04 \text{ mF cm}^{-2}$  in 1.0 M KOH).

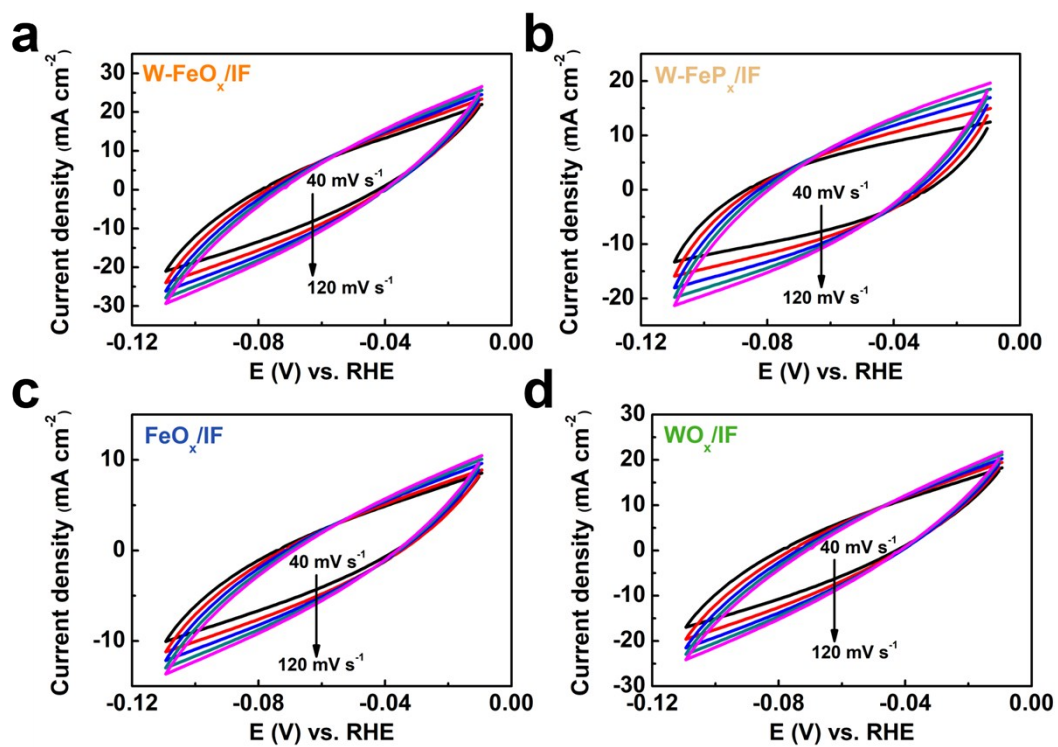

**Fig. S13** CV scans of double-layer capacitance measurement of (a) W-FeO<sub>x</sub>/IF, (b) W-FeP<sub>x</sub>/IF, (c) FeO<sub>x</sub>/IF, and (d) WO<sub>x</sub>/IF at different scanning rates.

**Table S3** Elemental values of fitted equivalent circuit.

| Samples                | $R_s$ ( $\Omega$ ) | $R_{ct}$ ( $\Omega$ ) |
|------------------------|--------------------|-----------------------|
| W-FeO <sub>x</sub> /IF | 1.047              | 5.578                 |
| W-FeP <sub>x</sub> /IF | 1.307              | 25.08                 |
| FeO <sub>x</sub> /IF   | 0.695              | 10.43                 |
| WO <sub>x</sub> /IF    | 0.619              | 27.71                 |
| Blank IF               | 0.627              | 34.94                 |

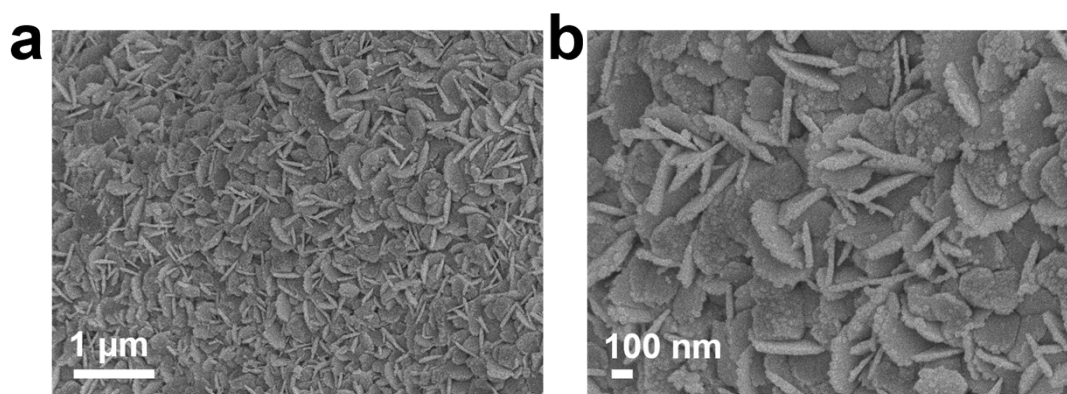

**Fig. S14** SEM images of (a, b) W-FeO<sub>x</sub>/IF after 100 h of chronoamperometry test and 10000 cycles of CV test.

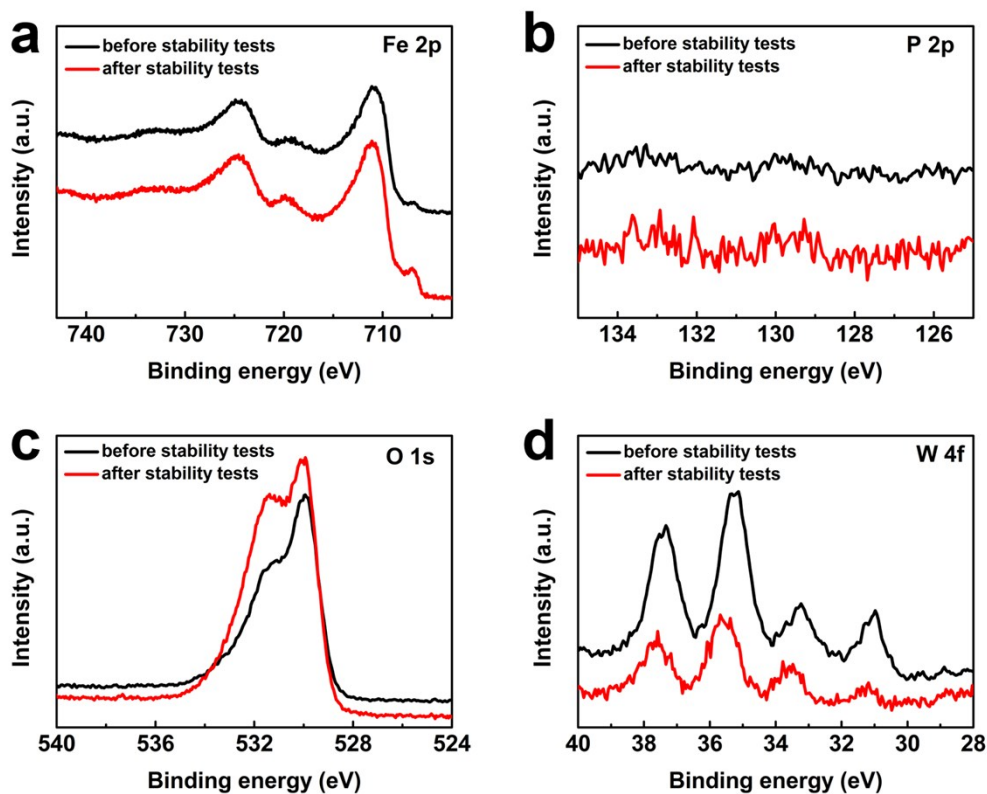

**Fig. S15** (a) Fe 2p, (b) P 2p, (c) O 1s and (d) W 4f XPS spectra of W-FeO<sub>x</sub>/IF before and after stability tests (100 h chronoamperometry at 100 mA cm<sup>-2</sup> and further 10000 cycles of CV) for HER in 1 M KOH.

**Table S4** Comparison of HER performance of W-FeO<sub>x</sub>/IF with other recently reported nonprecious electrocatalysts in 1 M KOH. (*j*: current density; *η*: overpotential)

| Catalysts                                                              | <i>j</i><br>(mA cm <sup>-2</sup> ) | <i>η</i><br>(mV) | Stability           | Reference                                                      |
|------------------------------------------------------------------------|------------------------------------|------------------|---------------------|----------------------------------------------------------------|
| W-FeP <sub>x</sub> /IF                                                 | 100                                | 237.7            | --                  |                                                                |
| W-FeO <sub>x</sub> /IF                                                 | 100                                | 154.0            | 10000 cycles        | This work                                                      |
|                                                                        | 500                                | 256.3            | 100 h               |                                                                |
| Mo-doped Ni <sub>2</sub> Fe <sub>1</sub> oxide                         | 50                                 | >260             | --                  | <i>J. Mater. Chem. A</i> , 2018, <b>6</b> , 8430-8440          |
| 2-cycle NiFeO <sub>x</sub> /CFP                                        | 100                                | >200             | --                  | <i>Nat. Commun.</i> , 2015, <b>6</b> , 7261                    |
| S-NiFe <sub>2</sub> O <sub>4</sub> /NF                                 | 100                                | >200             | --                  | <i>Nano energy</i> , 2017, <b>40</b> , 264-273.                |
| Fe <sub>1.89</sub> Mo <sub>4.11</sub> O <sub>7</sub> /MoO <sub>2</sub> | 10                                 | 197              | 1000 cycles<br>25 h | <i>Chem. Sci.</i> 2018, <b>9</b> , 5640-5645.                  |
| FeO <sub>x</sub> /FeP hybrid                                           | 100                                | >300             | 45 h                | <i>J. Mater. Chem. A</i> , 2018, <b>6</b> , 9467-9472          |
| g-FeO <sub>x</sub> -Cu <sub>3</sub> P@Cu                               | 100                                | 176              | 24 h                | <i>J. Mater. Chem. A</i> , 2020, <b>8</b> , 3351-3356          |
| Ni <sub>2</sub> P/Fe <sub>2</sub> P Ti foil                            | 100                                | 210              | 20 h                | <i>Adv. Energy Mater.</i> , 2018, <b>8</b> , 1800484           |
| FeP nanowire arrays                                                    | 10                                 | 194              | 8 h                 | <i>Chem. Commun.</i> , 2016, <b>52</b> , 2819-2822             |
| FeP NAs/CC                                                             | 10                                 | 218              | --                  | <i>ACS Catal.</i> , 2014, <b>4</b> , 4065                      |
| Ni <sub>1.5</sub> Fe <sub>0.5</sub> P/CF                               | 10                                 | 282              | 12 h                | <i>ACS Sustainable Chem. Eng.</i> , 2018, <b>6</b> , 6146-6156 |
| FeP NPs@NPC                                                            | 10                                 | 214              | --                  | <i>Nanoscale</i> , 2017, <b>9</b> , 3555-3560                  |
| FeP/GA                                                                 | 10                                 | 240              | 5000 cycles<br>12 h | <i>Chem Asian J</i> , 2018, <b>13</b> , 679-685                |
| Ni-doped FeP/C-3                                                       | 100                                | >165             | 12 h                | <i>Sci. Adv.</i> , 2019, <b>5</b> , eaav6009                   |
| MoO <sub>2</sub> -FeP@C                                                | 100                                | 190              | 5000 cycles<br>24 h | <i>Adv. Mater.</i> , 2020, <b>32</b> , 2000455                 |
